# Supplementary material for: Whole Genome Analyses of Chinese Population and De Novo Assembly of A Northern Han Genome
Source: PubMed Central journal article supplement (PMC6818495; doi:10.1016/j.gpb.2019.07.002), 2019-09-05
Supplement: mmc2.pdf [file mmc2.pdf]

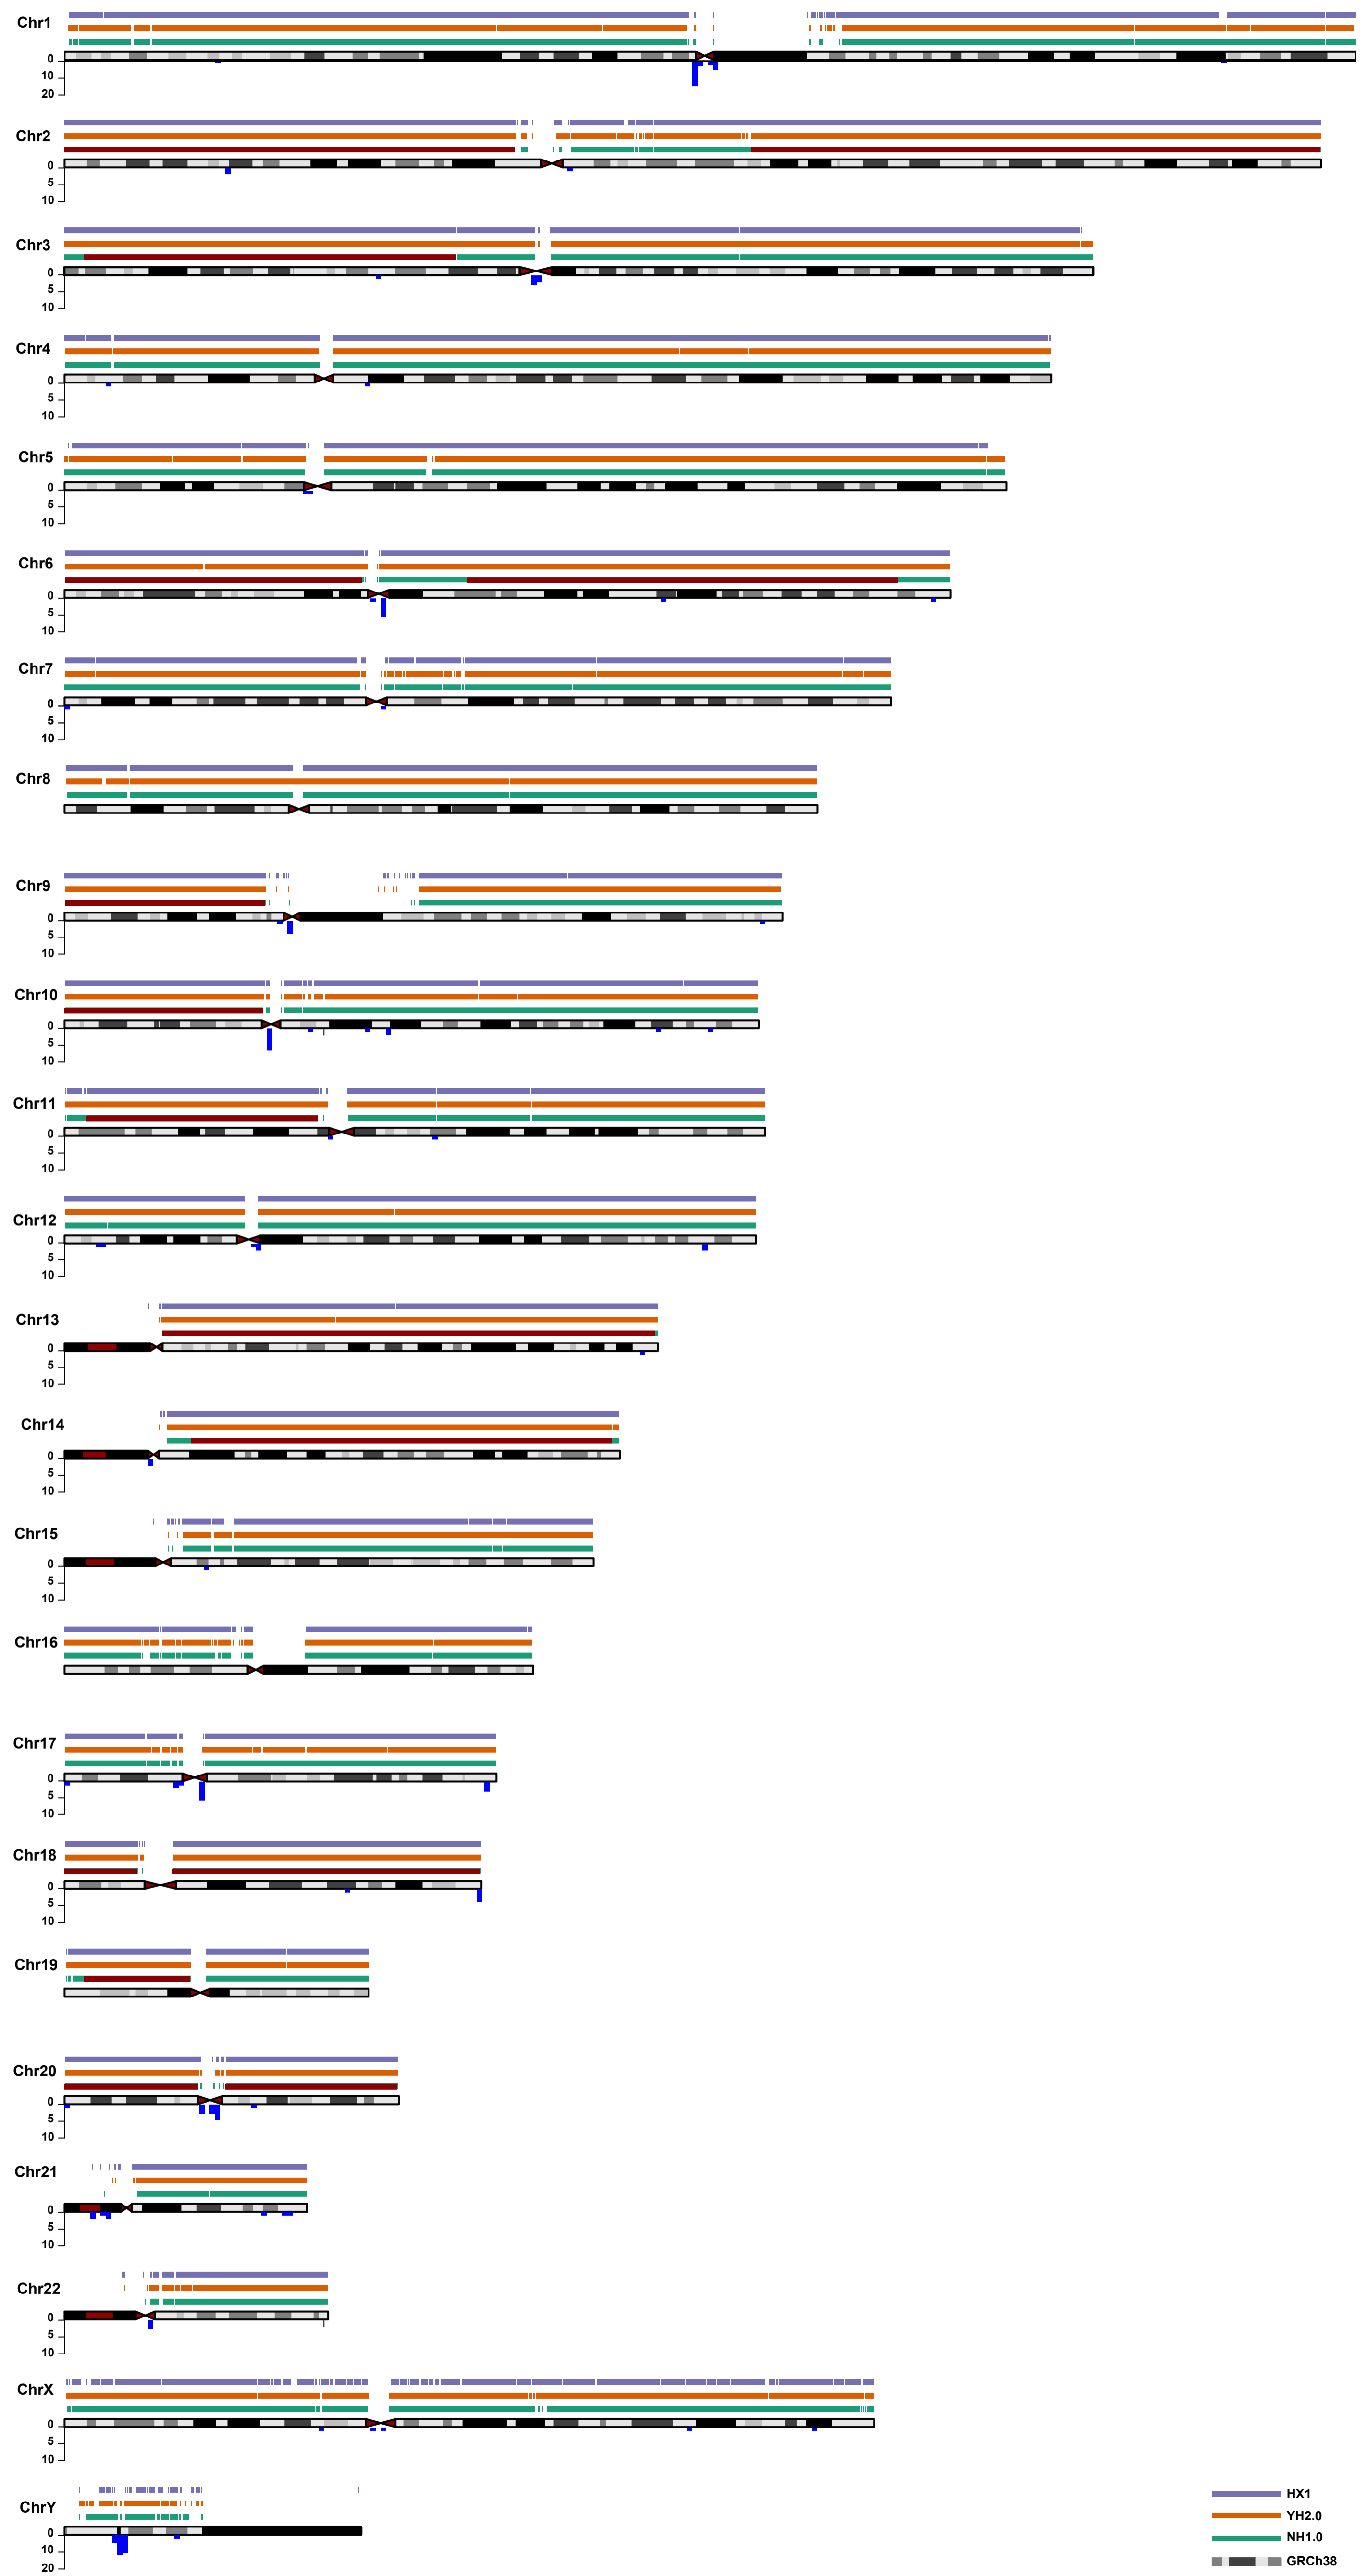

— HX1  
— YH2.0  
— NH1.0  
— GRCh38
